# Supplementary material for: A paper-based SERS assay for sensitive duplex cytokine detection towards the atherosclerosis-associated disease diagnosis
Source: Royal Society of Chemistry journal article supplement (doi:10.1039/c9tb02469g), 2019-12-06
Supplement: c9tb02469g1.pdf [file c9tb02469g1.pdf]

## Electronic Supplementary Information

### Paper-based SERS assay for sensitive and duplex cytokine detection towards atherosclerosis associated diseases diagnosis

Chunxia Li,<sup>a,‡</sup> Yuan Liu,<sup>b,‡</sup> Xiaoyan Zhou<sup>c</sup> and Yuling Wang<sup>b,\*</sup>

<sup>a</sup> Shanghai Jiao Tong University School of Medicine, Shanghai, China

<sup>b</sup> Department of Molecular Sciences, Macquarie University, NSW, Australia.

<sup>c</sup> Department of Neurology, Anyang No.3 Hospital, Anyang, Henan, China.

<sup>‡</sup> Chunxia Li and Yuan Liu contributed equally to this work.

Email: [yuling.wang@mq.edu.au](mailto:yuling.wang@mq.edu.au)

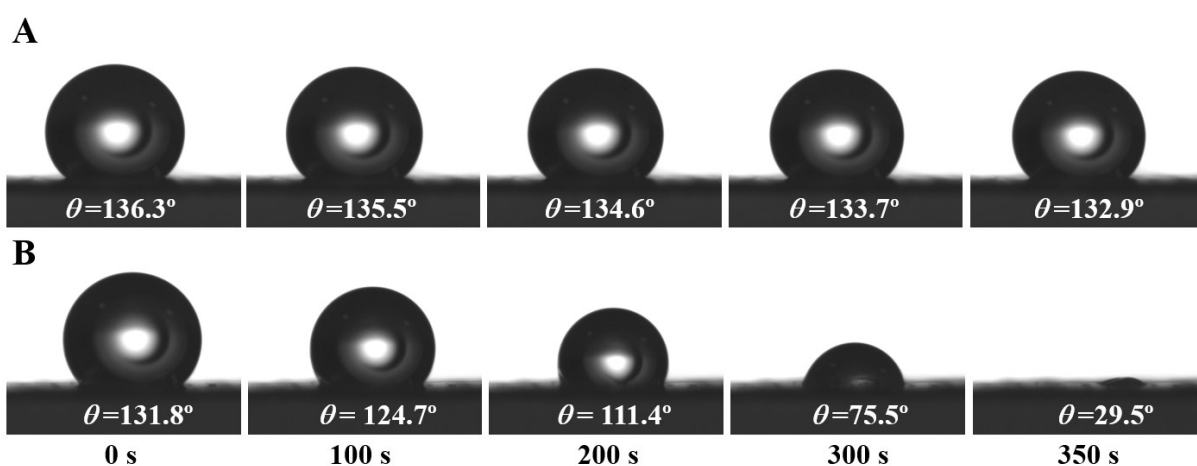

**Fig. S1.** Contact angle ( $\theta$ ) of 5  $\mu$ L MilliQ water droplet on PTFE membrane surface (A) before and (B) after pre-treatment.

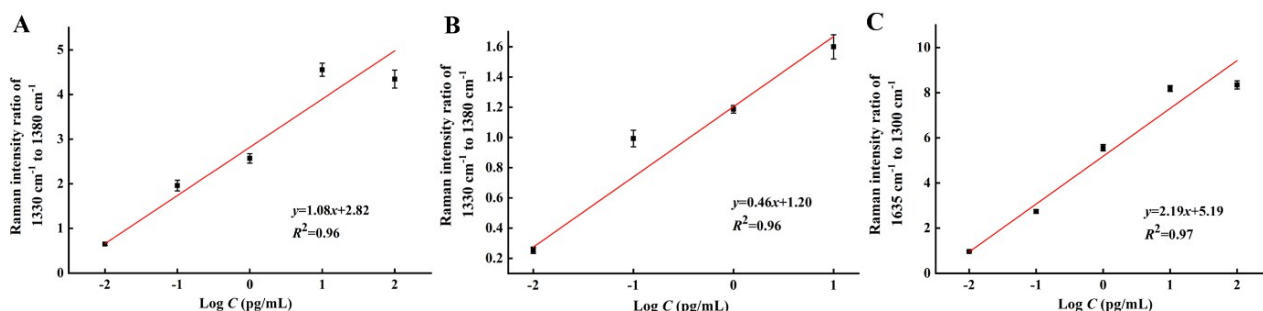

**Fig. S2.** Calibration curves between logarithmic concentration of target cytokines with SERS response. (A) IL-10 in PBS, (B) IL-10 in human serum and (C) MCP-1 in human serum.

### **Evaluation for the potential non-specific binding of SERS nanotags in deep layer of PTFE substrate**

Since PTFE membrane is multi-layered, to investigate whether the non-specific binding of SERS nanotags in deeper membrane skeleton might affect the assay specificity towards target cytokines, the laser penetration depth ( $d$ ) was evaluated. Basically,  $d$  was calculated with equation  $d=\lambda/(NA)^2$ ,<sup>1</sup> where  $\lambda$  refers to laser wavelength,  $NA$  corresponds to numerical aperture of the used objective (long working distance,  $\times 50$ ). In this work,  $\lambda$  is 633 nm and  $NA$  is 0.6, giving a laser penetration depth of 1.76  $\mu\text{m}$ . The thickness of PTFE membrane is 10  $\mu\text{m}$ . Hence, we conclude that the SERS measurement only occurs at the top surface of substrate, the potential non-specific deeper binding of SERS nanotags will not affect the assay performance in specificity.

### **Reference**

1 S. Laschi, I. Palchetti, and M. Mascini, *Sens. Actuators B: Chem.* 2006, **114**, 460-465.
